# Supplementary material for: Simple chemical synthesis of intermetallic Pt2Y bulk nanopowder
Source: Royal Society of Chemistry journal article supplement (doi:10.1039/d0ma00419g), 2020-01-01
Supplement: d0ma00419g1.pdf [file d0ma00419g1.pdf]

Electronic Supplementary Information

## Simple Chemical Synthesis of Intermetallic Pt<sub>2</sub>Y Bulk Nanopowder

Yasukazu Kobayashi,<sup>\*a</sup> Shohei Tada<sup>b</sup>, and Ryuji Kikuchi<sup>c</sup>

<sup>a</sup> *Interdisciplinary Research Center for Catalytic Chemistry, National Institute of Advanced Industrial Science and Technology (AIST), 1-1-1 Higashi, Tsukuba, Ibaraki 305-8565, Japan, E-mail: yasukobayashi@aist.go.jp.*

<sup>b</sup> *Department of Materials Science and Engineering, Ibaraki University, 4-12-1 Nakanarusawacho, Hitachi, Ibaraki 316-8511, Japan.*

<sup>c</sup> *Department of Chemical System Engineering, The University of Tokyo, 7-3-1 Hongo, Bunkyo-ku, Tokyo 113-8656, Japan.*

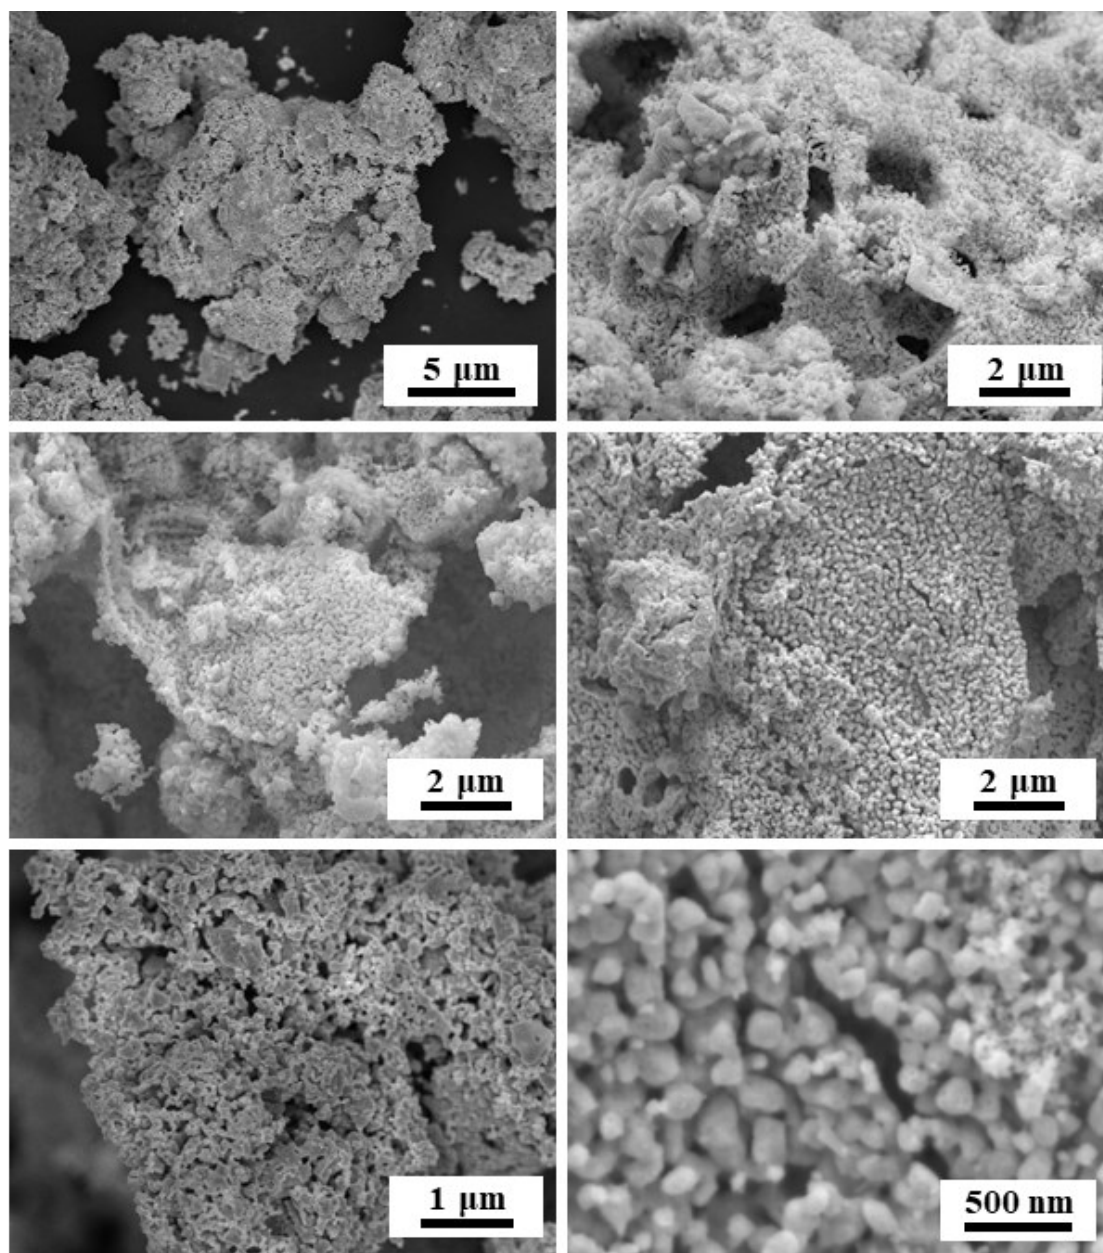

**Fig. S1** SEM images of the reduced  $\text{Pt}_2\text{Y}$  bulk nanopowder.

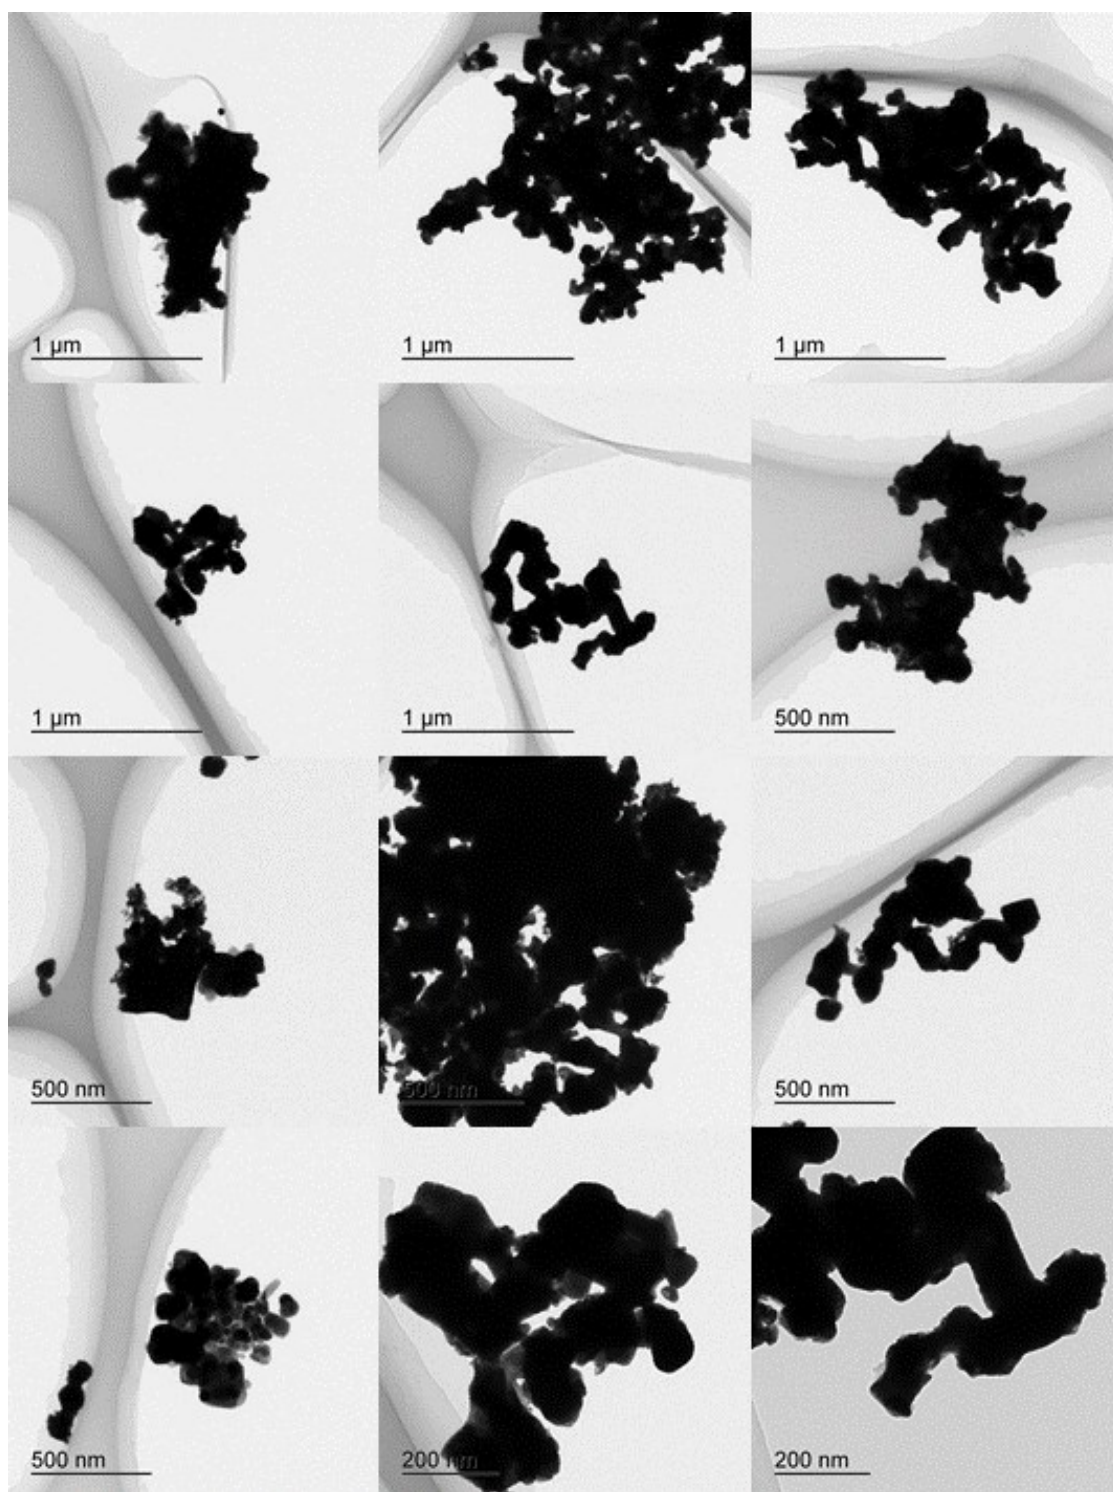

**Figure S2** □ TEM images of the reduced Pt<sub>2</sub>Y bulk nanopowder.

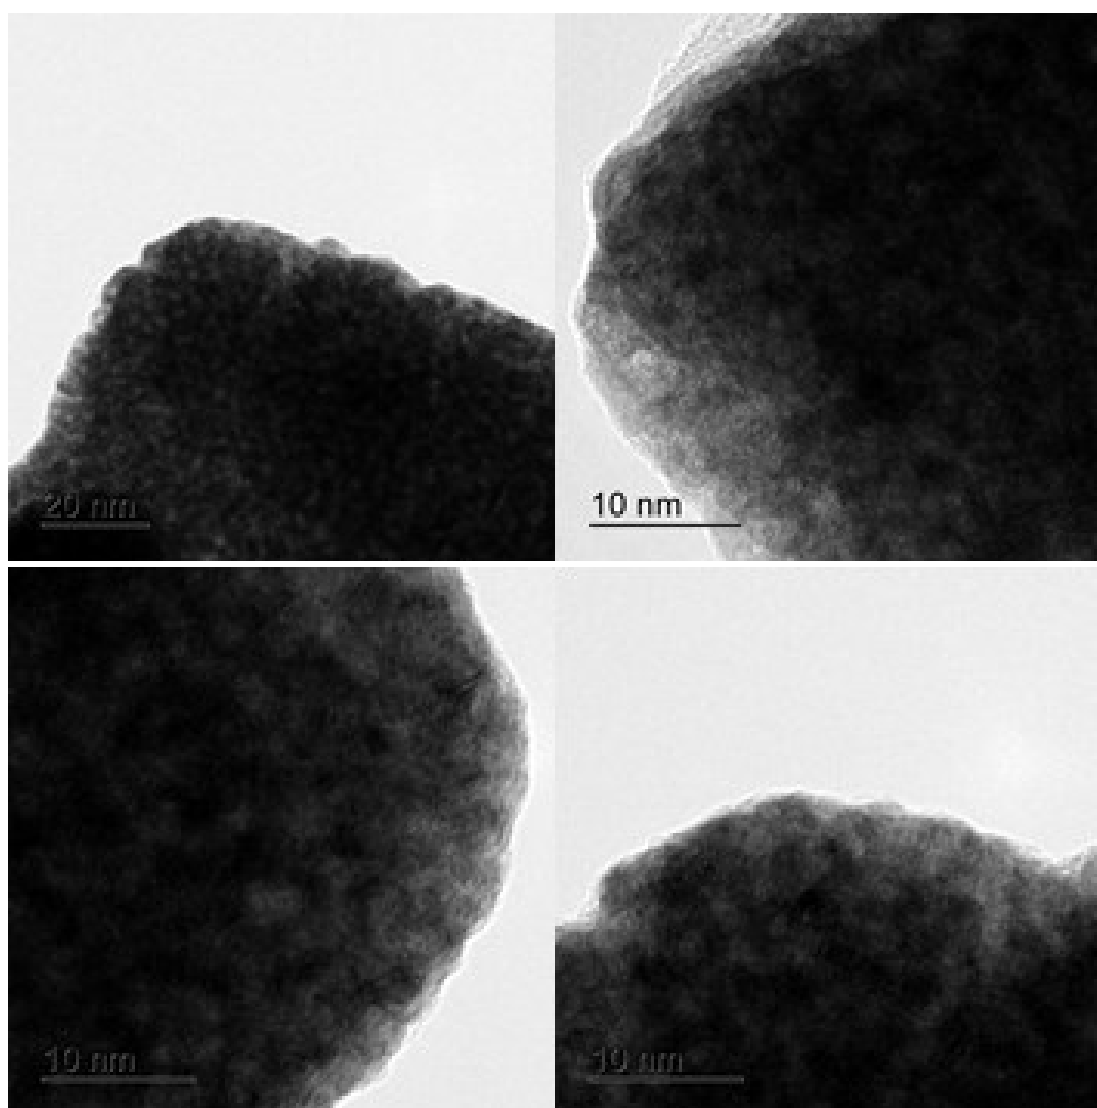

**Figure S3** □ Zoomed TEM images of the reduced  $\text{Pt}_2\text{Y}$  bulk nanopowder.

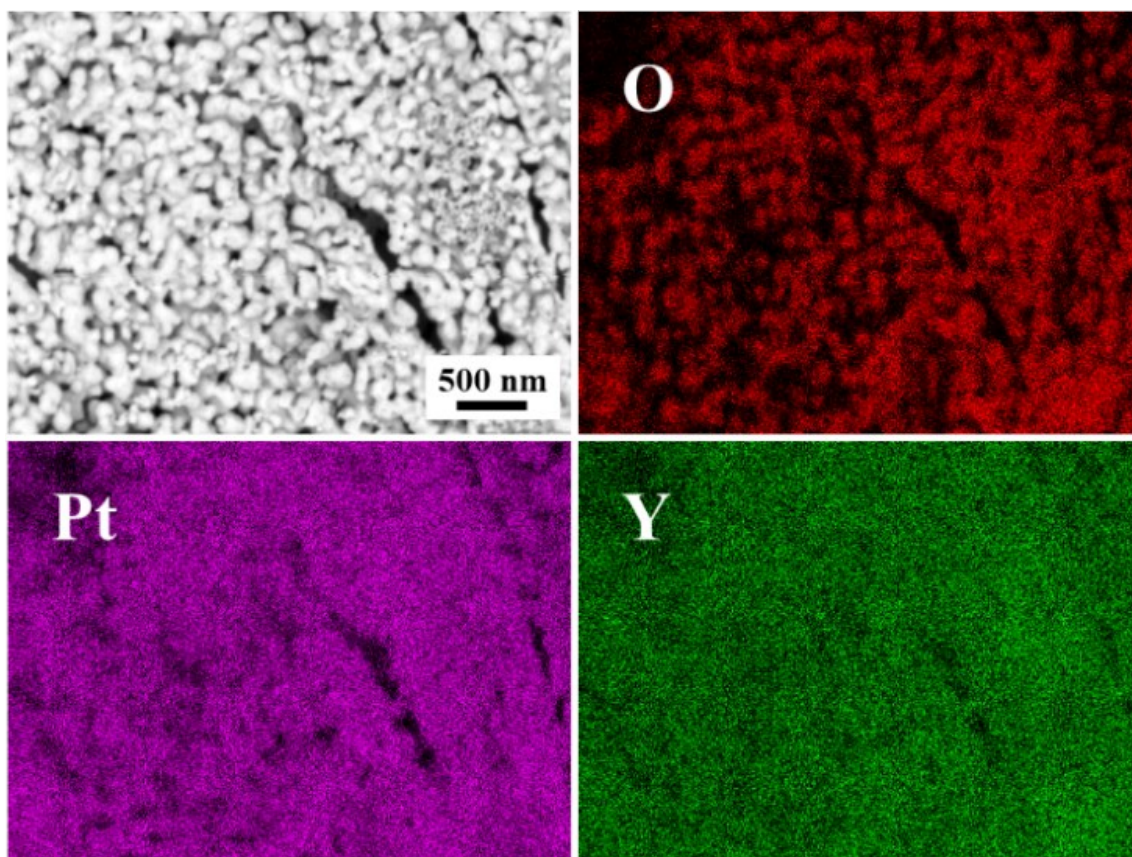

**Fig. S4** □ Elemental mapping of Pt, Y and O on reduced  $\text{Pt}_2\text{Y}$  bulk nanopowder by SEM-EDS analysis.



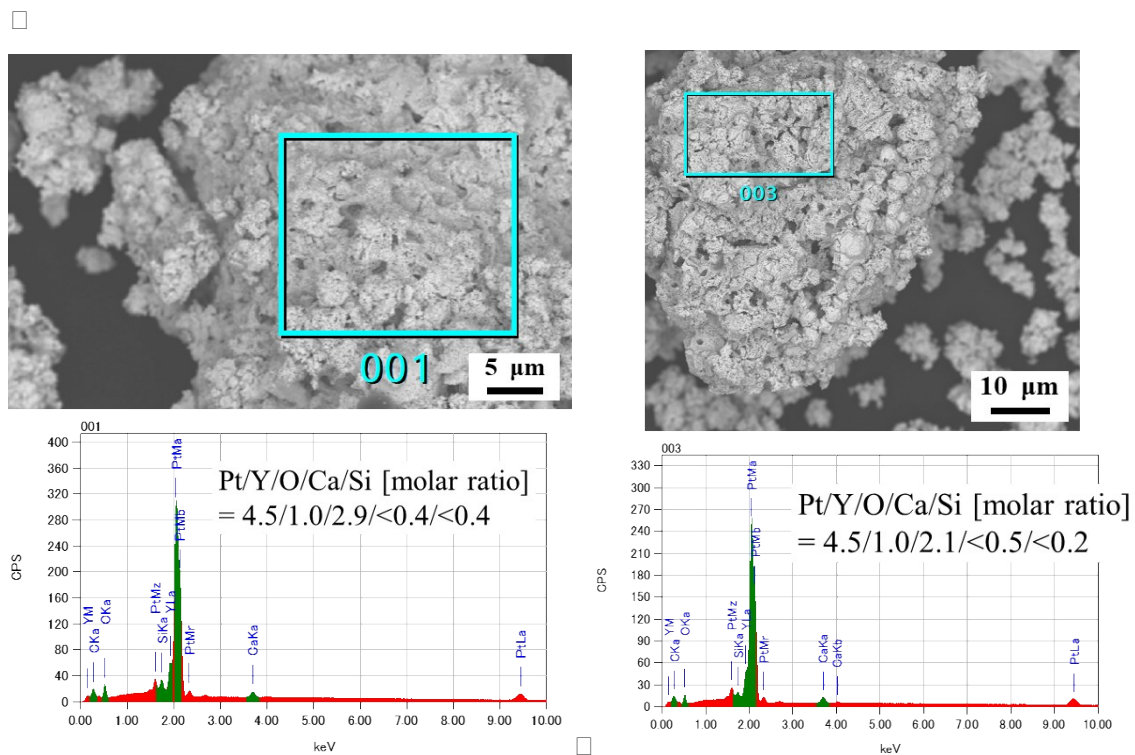

**Fig. S5** □ Elemental analysis of 2 different positions on the Pt<sub>2</sub>Y bulk nanopowder by SEM-EDS analysis.

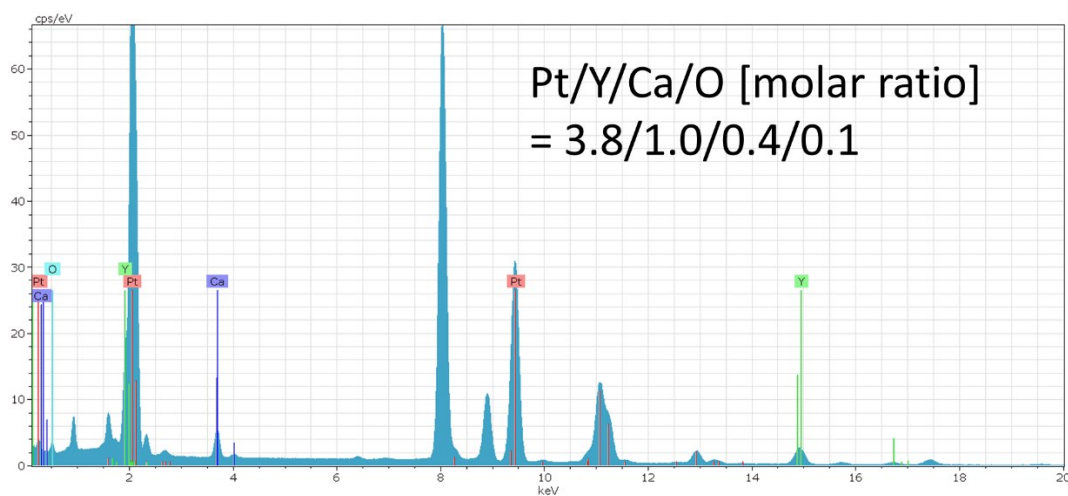

**Figure S6** □ Elemental analysis result in the reduced Pt<sub>2</sub>Y bulk nanopowder by TEM-EDS. The measured location is inside of a yellow square in Fig. 3. Copper-based micro grids (NP-C15 (Lacy Carbon film), Okenshoji Co., Ltd.) were used to fix the sample powder and therefore non-identified signals in the figure are mainly due to the copper.

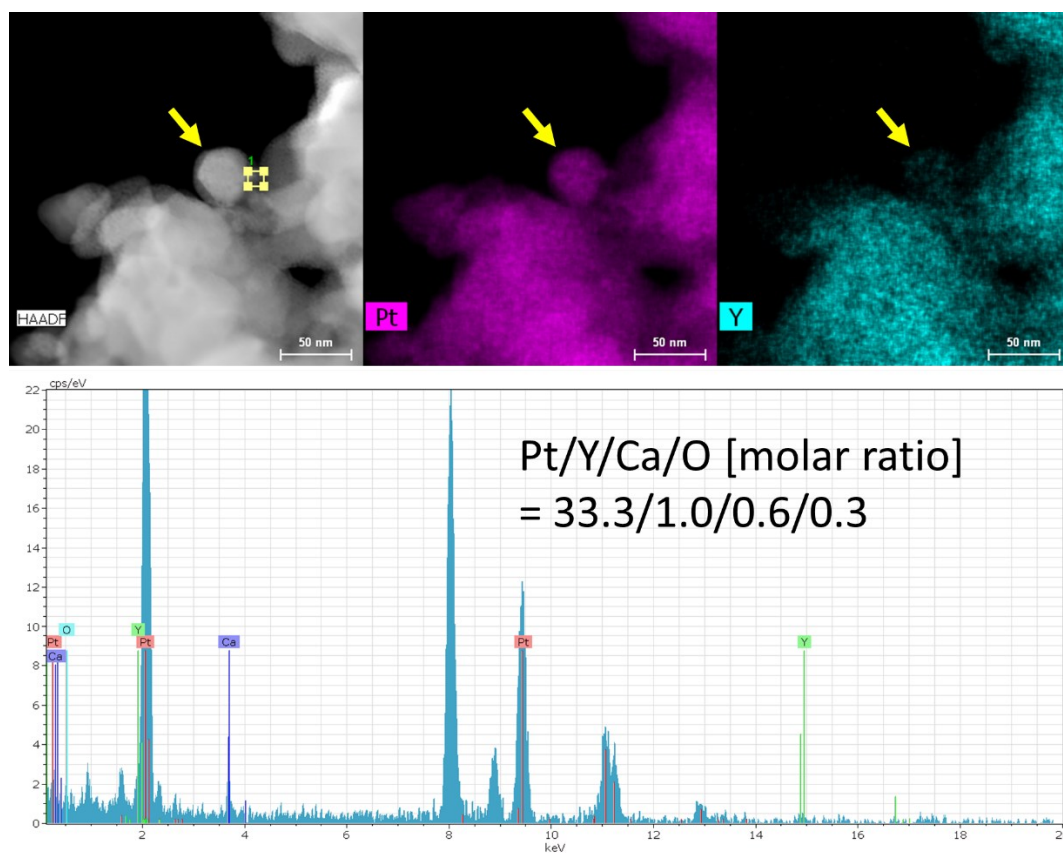

**Figure S7** □ Elemental analysis result in the reduced  $\text{Pt}_2\text{Y}$  bulk nanopowder by TEM-EDS. The measured location is inside of a yellow square. Copper-based micro grids (NP-C15 (Lacy Carbon film), Okenshoji Co., Ltd.) were used to fix the sample powder and non-identified signals in the figure are mainly due to the copper. An arrow indicates the position of a platinum particle.



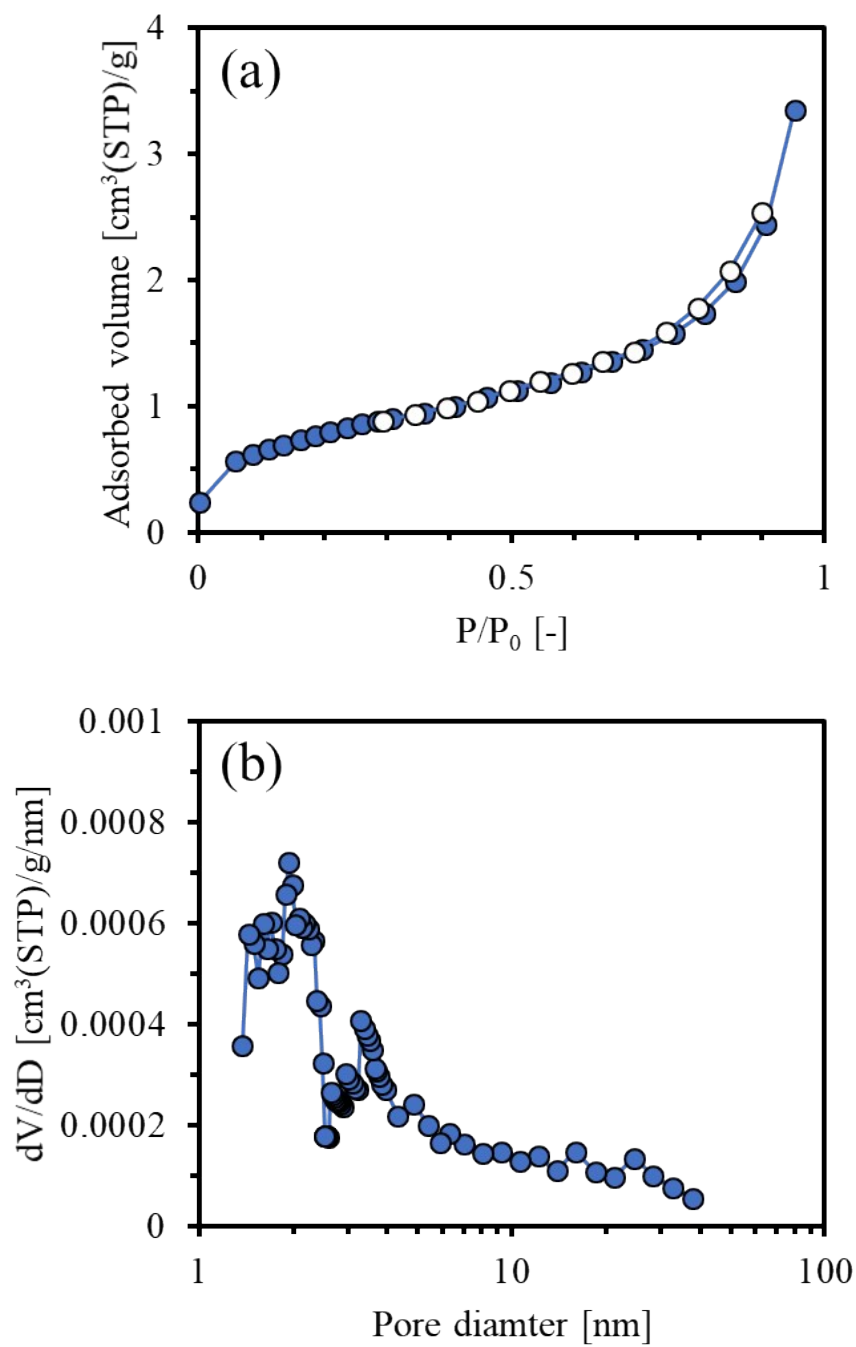

**Fig. S8** (a) Adsorption and desorption isotherms of nitrogen and (b) the pore size distributions for the Pt<sub>2</sub>Y bulk nanopowder. The pore size distribution was analysed from the measured isotherms using the Barrett, Joyner, and Halenda (BJH) method.
